# Supplementary material for: Fabrication of super-hydrophobic and super-oleophilic boehmite membranes from anodic alumina oxide film via a two-phase thermal approach
Source: Royal Society of Chemistry journal article supplement (doi:10.1039/b600733c), 2006-01-01
Supplement: b600733c.pdf [file b600733c.pdf]

## Fabrication of Super-hydrophobic and Super-oleophilic Boehmite Membranes from Anodic Alumina Oxide Film via a Two-Phase Thermal Approach

Kangjian Tang, Jihong Yu\*, Yuanyuan Zhao, Yang Liu, Xiaofang Wang, Ruren Xu

State Key Laboratory of Inorganic Synthesis and Preparative Chemistry,  
Jilin University, Changchun 130012, P. R. China

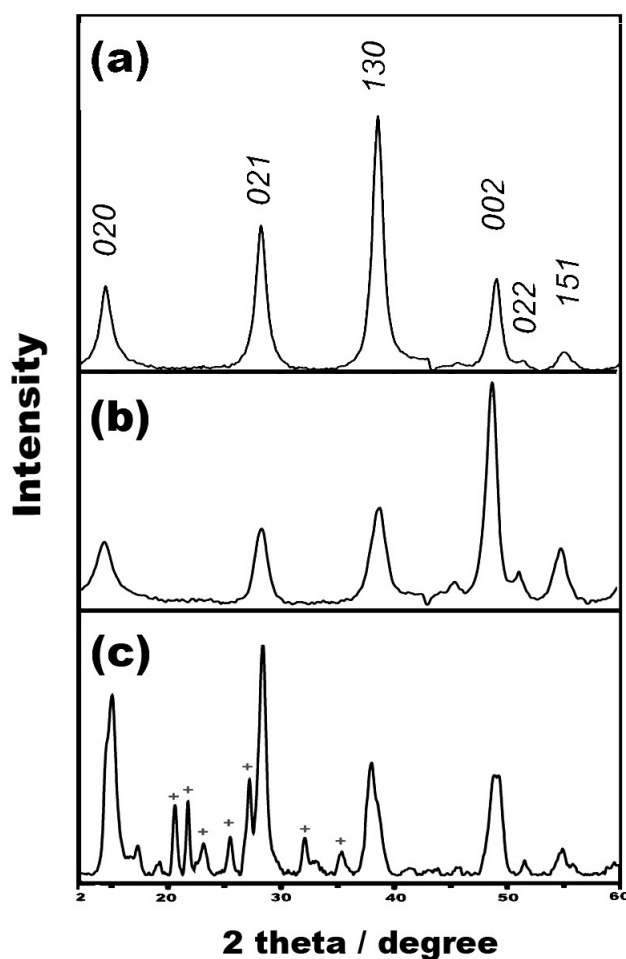

**Figure S1.** XRD patterns of as-prepared membranes. a) AlO(OH) membrane as shown in Figure 2b obtained by reaction (i) (JCPDS 74-1895). b) Membrane shown in Figure 3b obtained by reaction (vii). c) Membrane shown in Figure 2f obtained by reaction (v). AlPO<sub>4</sub> phase (JCPDS 48-0652) marked by plus symbols resulted from the partial reaction of Al and P source coexisted with AlO(OH)

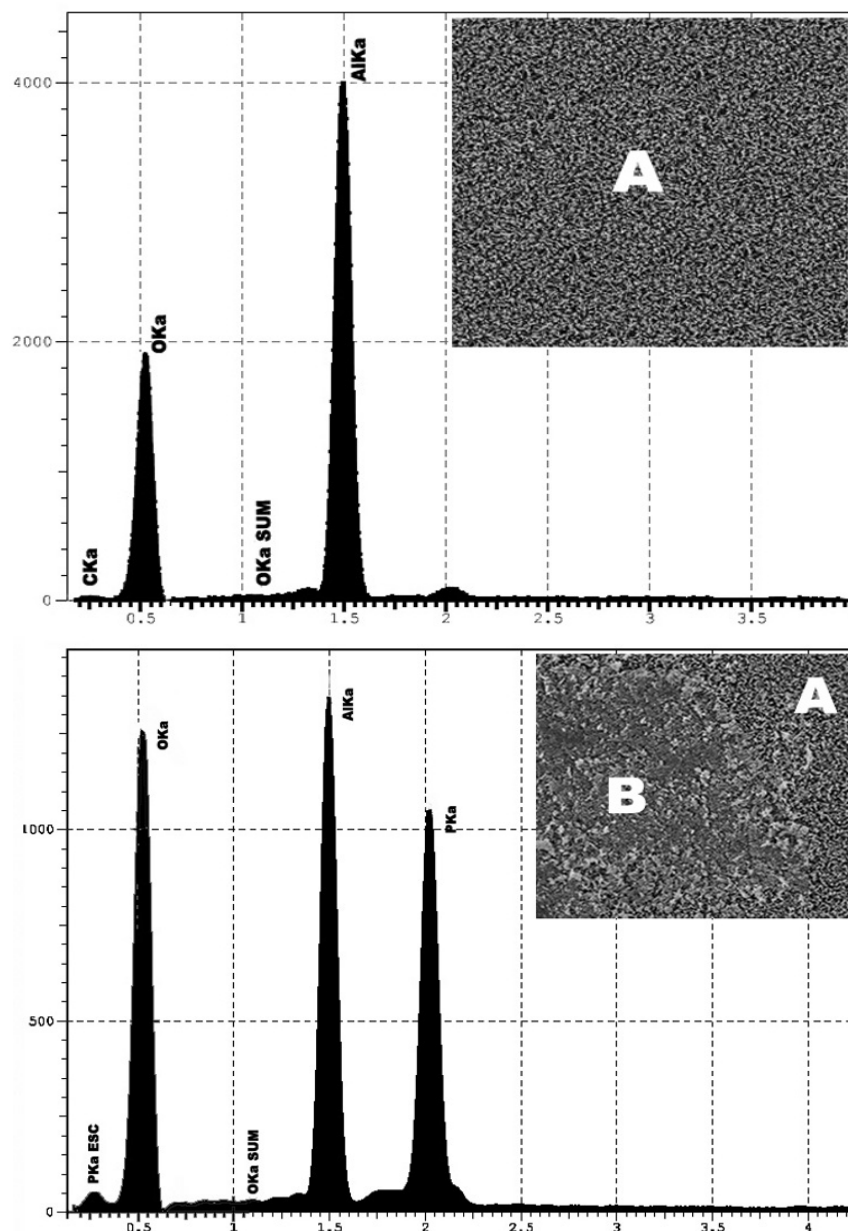

**Figure S2.** EDX analyses of different areas (XRD patterns shown as Figure S1-c). Area A: shows oriented AlO(OH) crystals. Area B: shows AlPO<sub>4</sub> crystals. The AlO(OH) crystals cover a wide area while AlPO<sub>4</sub> crystals only cover a minor area.

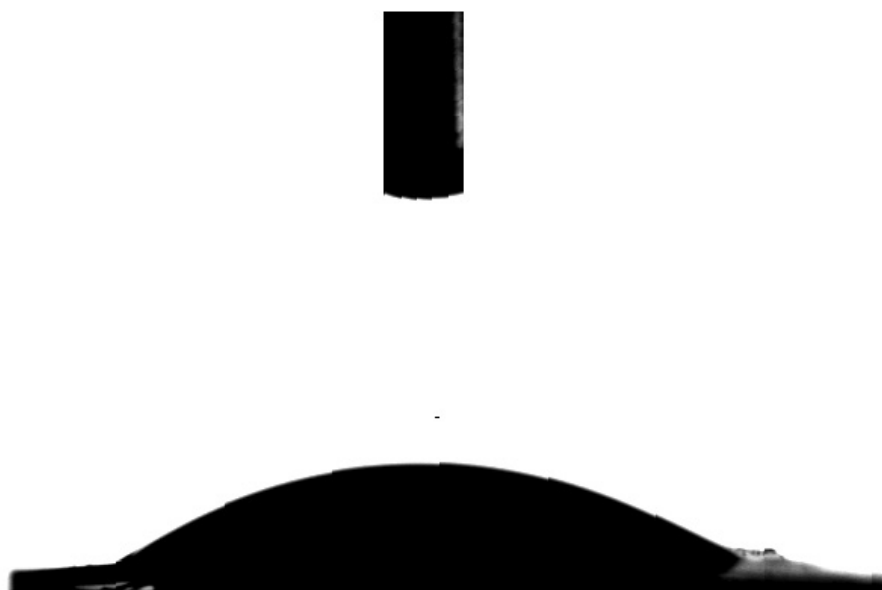

**Figure S3.** Shape of a water droplet on the membrane as shown in Figure 3b. The CA is about  $24.5^\circ$ .
